# Supplementary material
Source: publisher figshare collection journal article supplement (https://acs.figshare.com/ndownloader/files/24028716)
Supplement: Supplementary file 1 [file 24028716]

# **Electrodeposited NiFe<sub>2</sub>Se<sub>4</sub> on nickel foam as binder-free electrode for high performance asymmetric supercapacitor**

Beirong Ye, Xianjun Cao, Qiang Zhao\*, Jinshu Wang

School of Materials and Energy, University of Electronic Science and Technology of China, Chengdu 610054, China

---

\* Corresponding author: zqphys@uestc.edu.cn

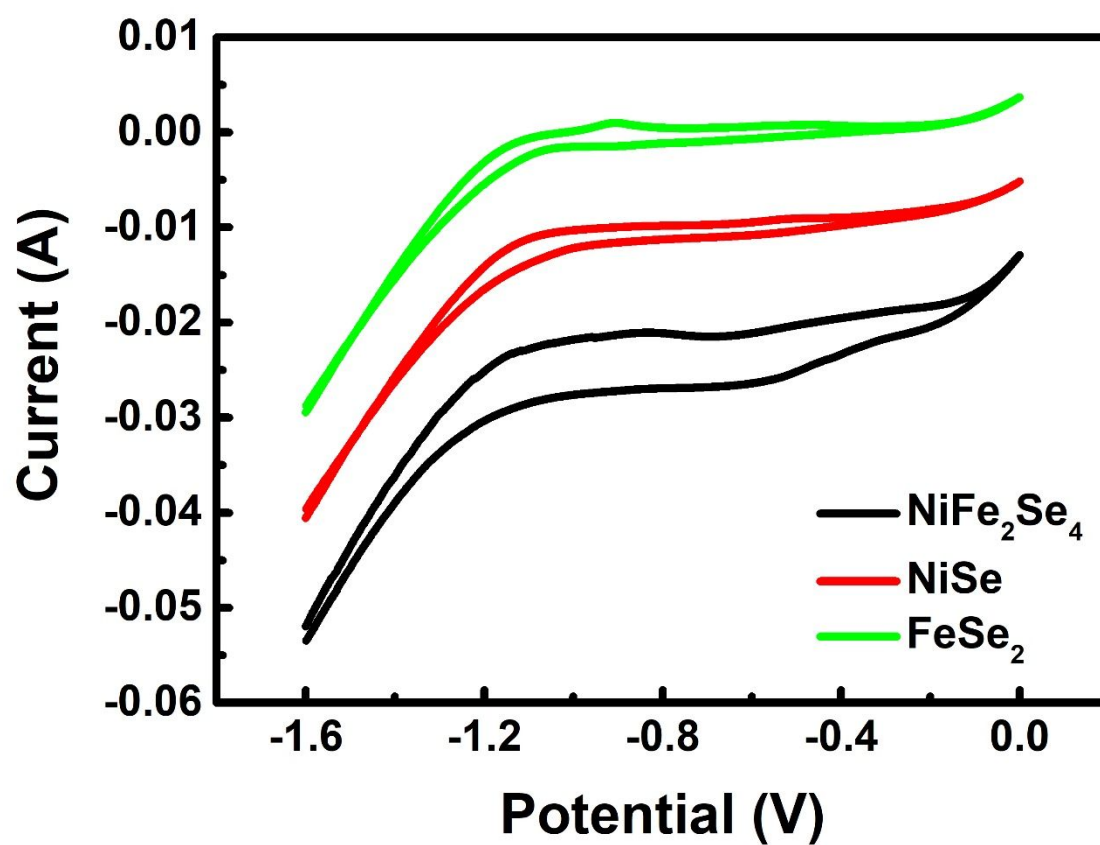

Figure S1. CV curves during electrodeposition process.

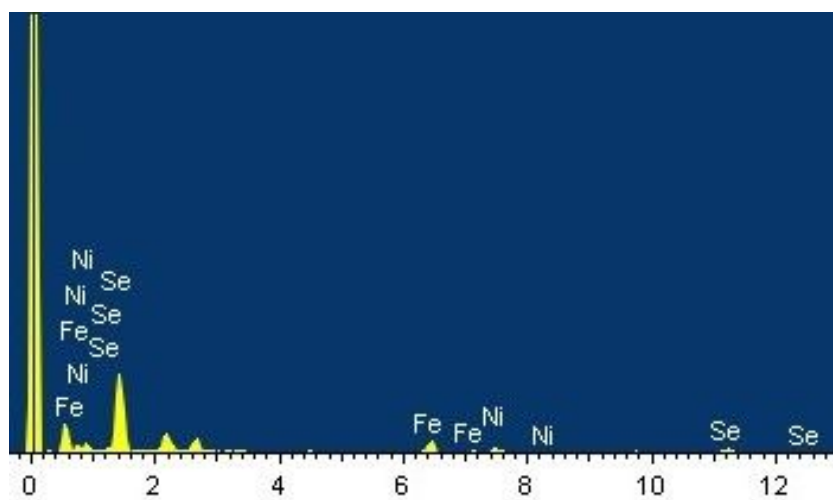

Figure S2. EDS pattern of  $\text{NiFe}_2\text{Se}_4$ .

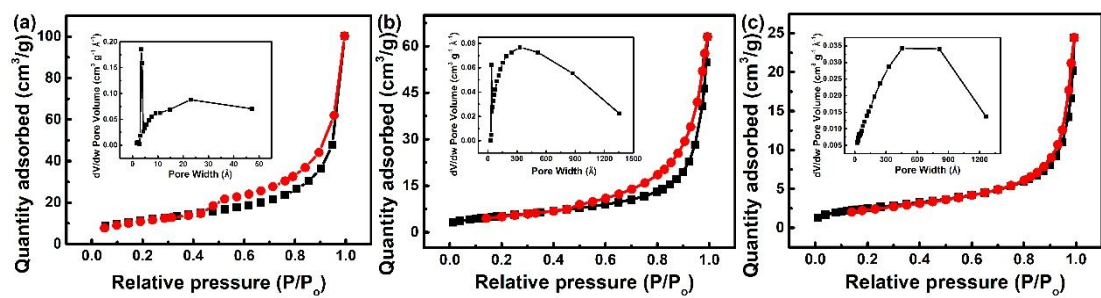

Figure S3 BET of (a) NFSe-20, (b) NiSe and (c) FeSe<sub>2</sub> samples and their corresponding BJH plot (inset).

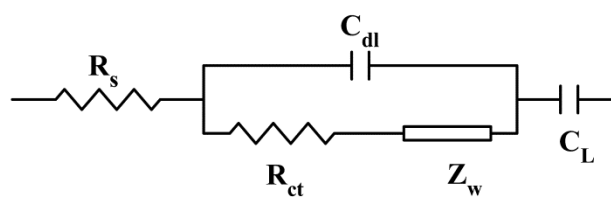

Figure S4. Equivalent circuit models used for the EIS simulation in Figure 3d and 6b.

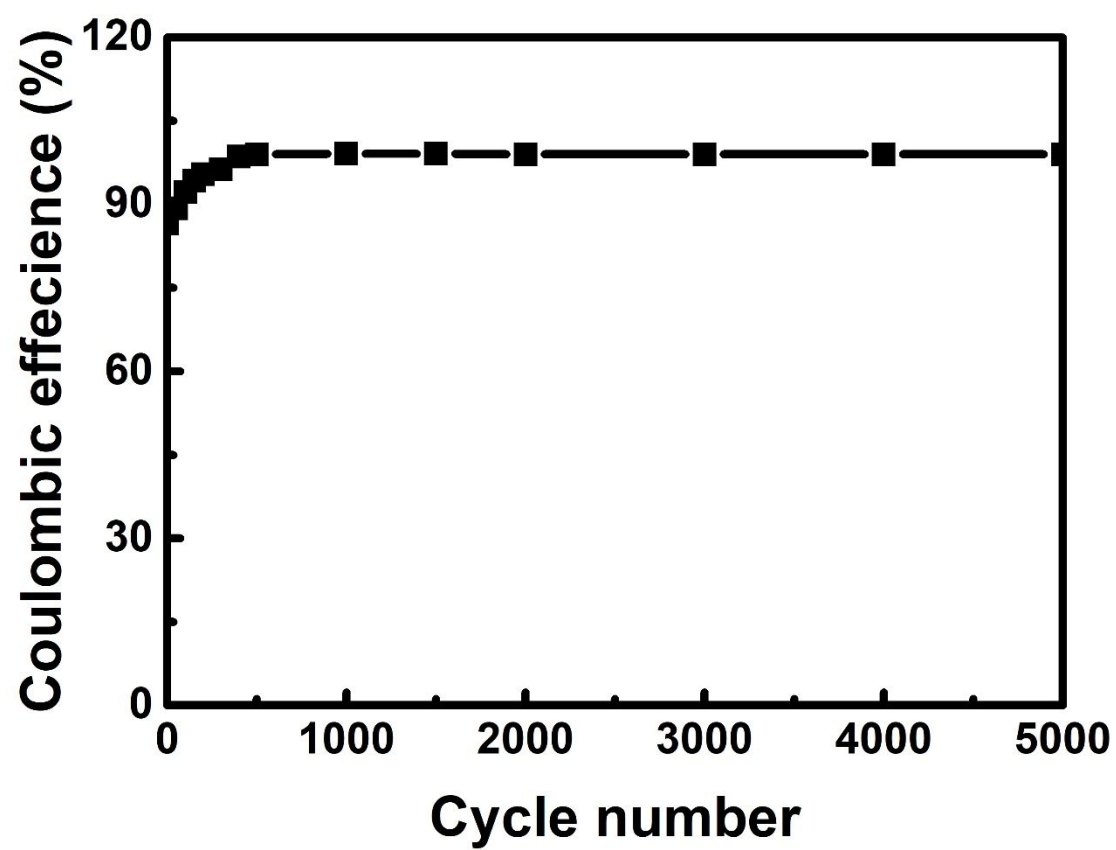

Figure S5. Coulombic efficiency at 2 A g<sup>-1</sup>.

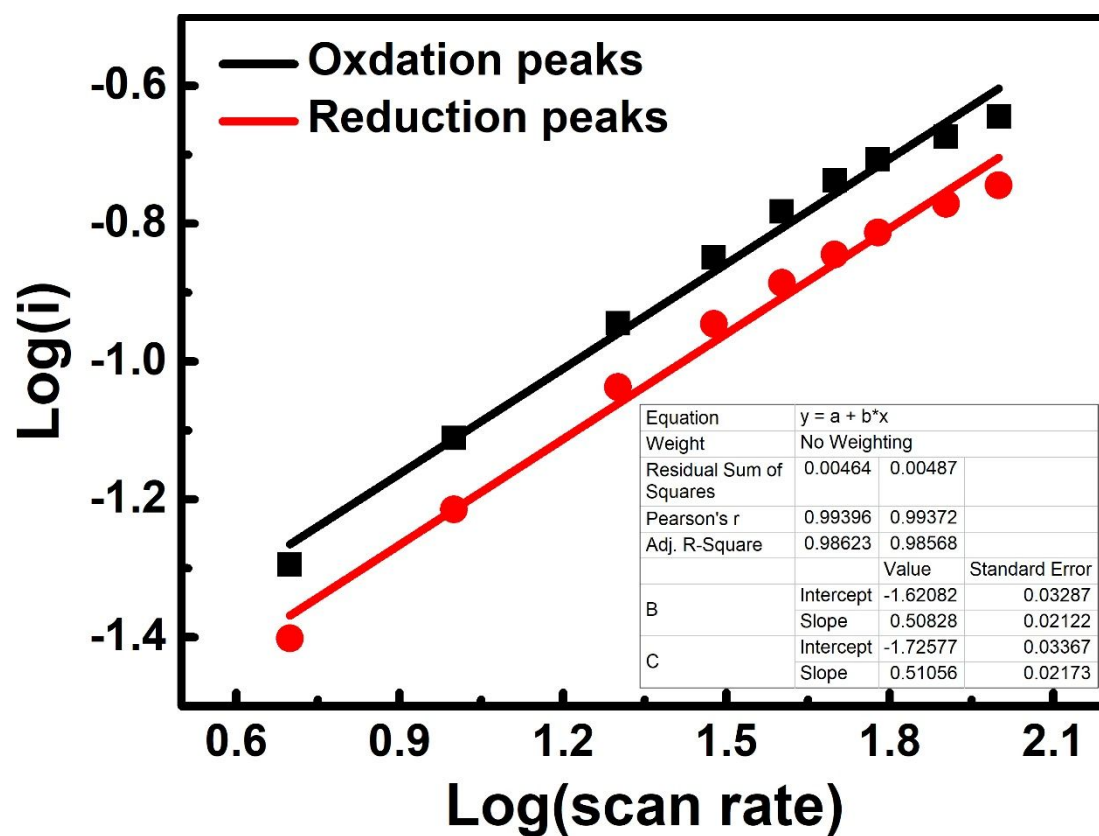

Figure S6. Power law dependence of current  $i$  on scan rate  $v$  show.

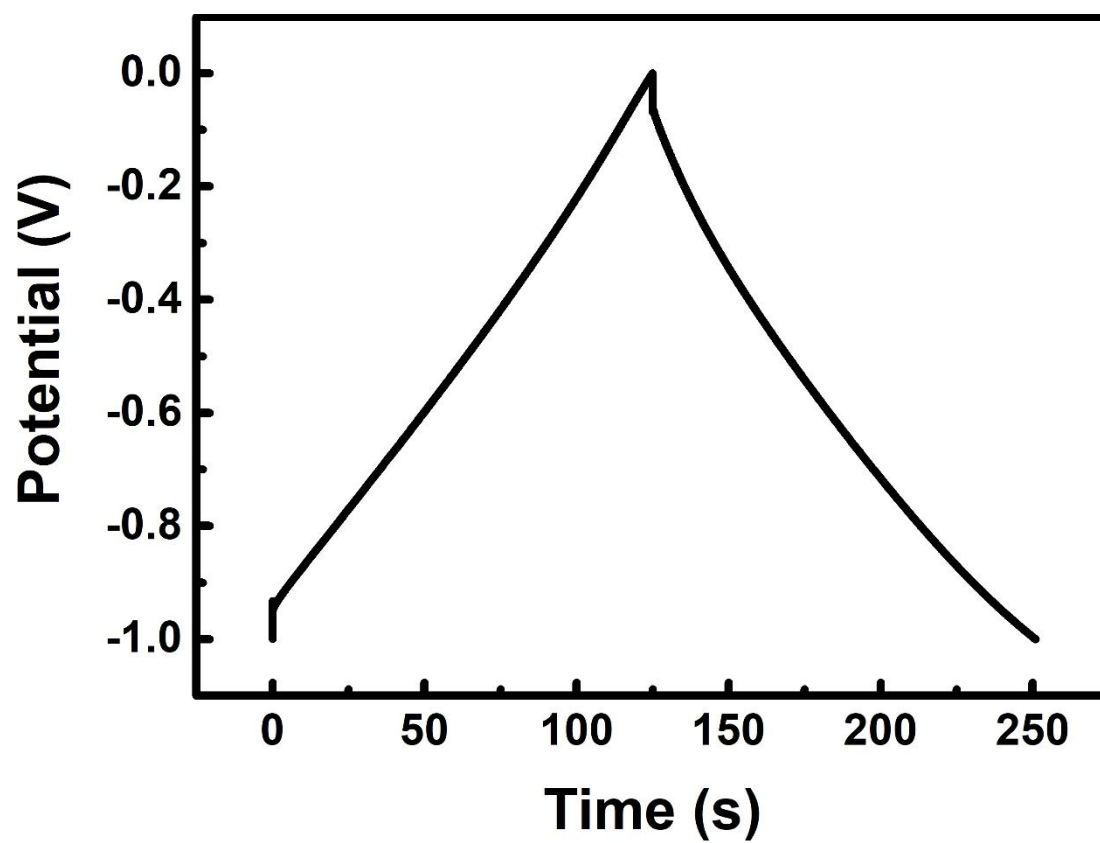

Figure S7. GCD curve of AC electrode at  $2 \text{ A g}^{-1}$ .



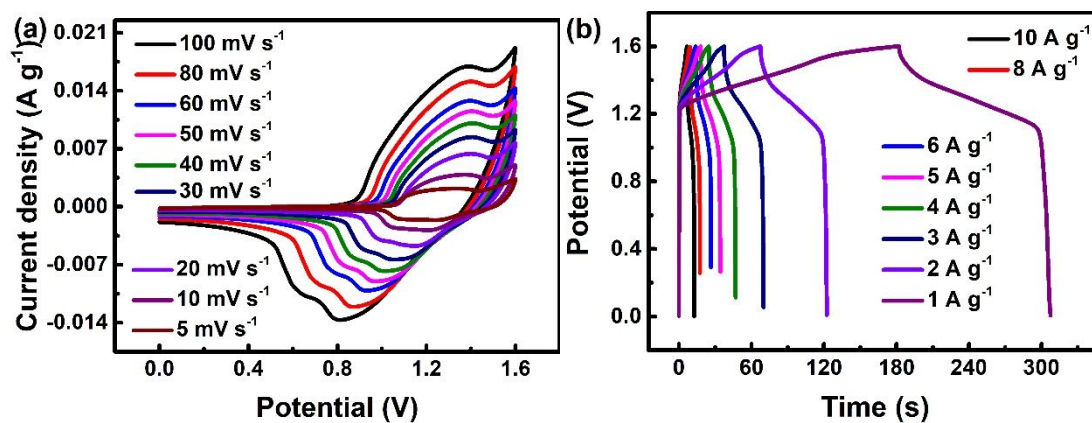

Figure S8. CV curves of NiSe//AC ASC at different scan rates, (b) GCD curves of NiSe//AC ASC at different current density.

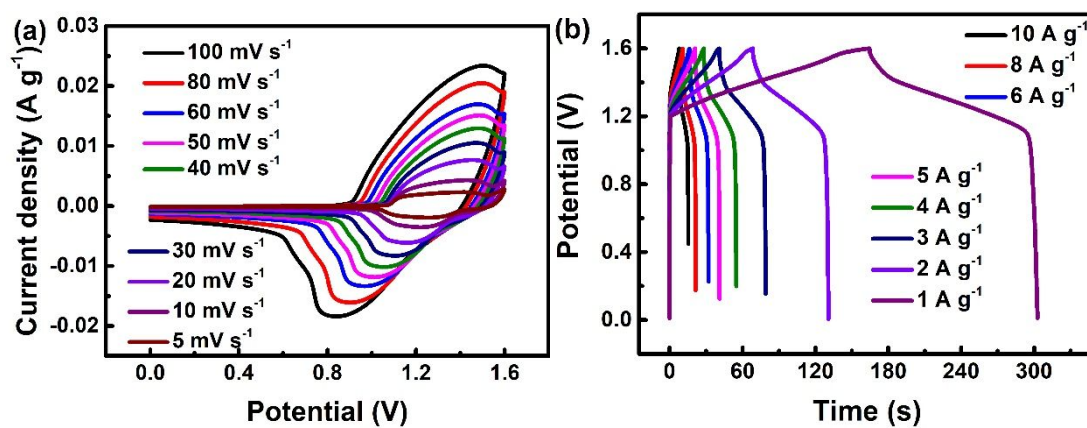

Figure S9. CV curves of FeSe<sub>2</sub>//AC ASC at different scan rates, (b) GCD curves of FeSe<sub>2</sub>//AC ASC at different current density.

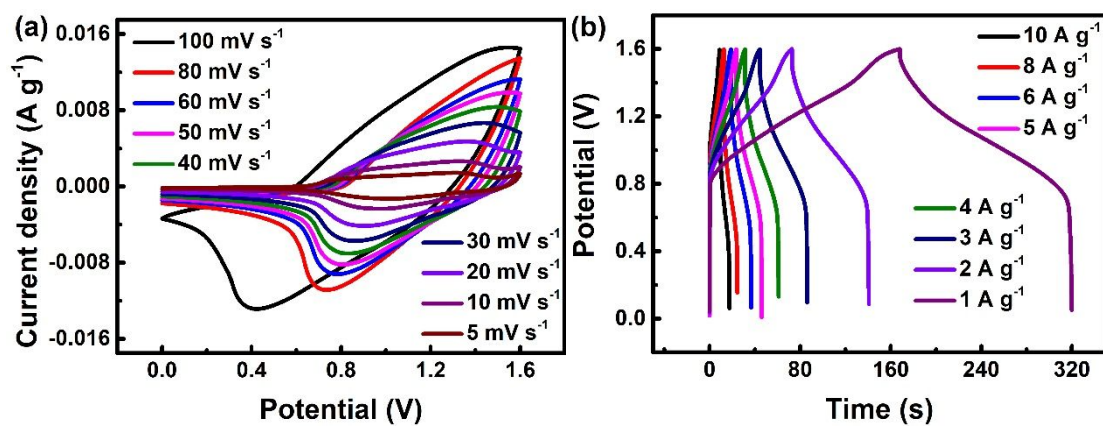

Figure S10. CV curves of NFSe-5//AC ASC at different scan rates, (b) GCD curves of NFSe-5//AC ASC at different current density.

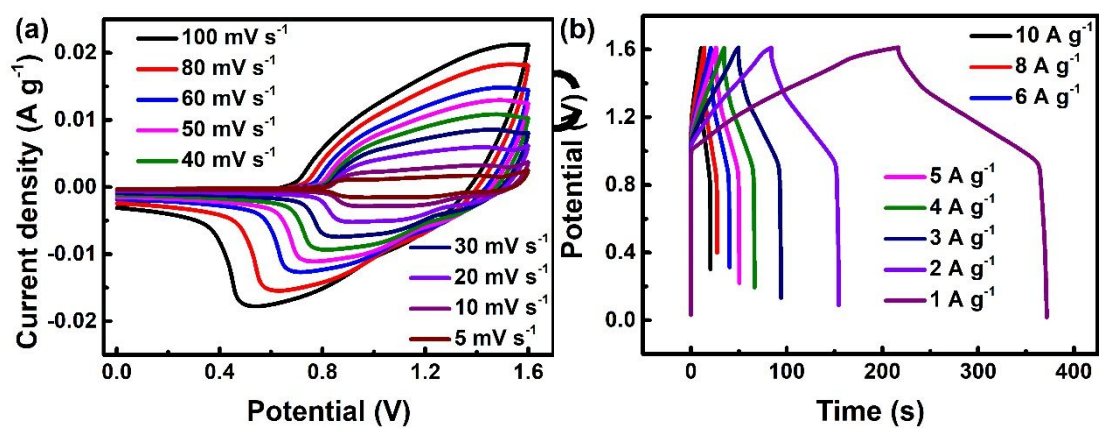

Figure S11. CV curves of NFSe-50//AC ASC at different scan rates, (b) GCD curves of NFSe-50//AC ASC at different current density.

The specific capacity ( $C_s$ , mAh g<sup>-1</sup>) and specific capacitance ( $C_m$ , F g<sup>-1</sup>) of the materials and ASC device was calculated from the GCD curves using eqs (S1) and eqs (S2), as follows

$$C_s = \frac{I \times \Delta t}{m \times 3.6} \quad (S1)$$

$$C_m = \frac{I \times \Delta t}{m \times \Delta V} \quad (S2)$$

where  $I$  is the discharge current density (A g<sup>-1</sup>);  $m$  represents the mass of active materials grown on NF for three-electrode configurations (g);  $\Delta t$  is the discharge time (s); and  $\Delta V$  is the potential window (V).

The energy density ( $E$ , Wh kg<sup>-1</sup>) and power density ( $P$ , W kg<sup>-1</sup>) of the ASCs were investigated by eqs (S3) and (S4), respectively, as follows

$$E = \frac{C_m \times \Delta V^2}{2 \times 3.6} \quad (S3)$$

$$P = \frac{3600 \times E}{\Delta t} \quad (S4)$$

In order to achieve the optimum mass ratio of as-prepared positive electrode to AC negative electrodes, we examined the charge balance using the given equation,  $q^+ = q^-$ . The mass of the positive electrode and negative electrode was tuned according to the following eq (S5) and (S6)

$$Q = C \times \Delta V \times m \quad (S5)$$

$$\frac{m^+}{m^-} = \frac{C_- \times \Delta V_-}{C_+ \times \Delta V_+} \quad (S6)$$

Wherein  $C$  is the specific capacity (investigated through the three-electrode configuration); + and – represents positive and negative electrodes.

Table S1 Comparison of impedance data of different electrode materials

| Sample            | $R_s$ ( $\Omega \text{ cm}^2$ ) | $CPE, Y_o$ ( $S \text{ s}^n$ ) | Freq power.<br>$n$ [ $0 < n < 1$ ] | $R_{ct}$ ( $\Omega \text{ m}^2$ ) | $W, Y_o$ ( $S \text{ s}^{1/2} \text{ cm}^{-2}$ ) |
|-------------------|---------------------------------|--------------------------------|------------------------------------|-----------------------------------|--------------------------------------------------|
| NiSe              | 0.65                            | 0.0053                         | 0.68                               | 0.76                              | $2.41 \times 10^{-4}$                            |
| FeSe <sub>2</sub> | 0.81                            | 0.0026                         | 0.80                               | 0.91                              | $1.88 \times 10^{-17}$                           |
| NFSe-5            | 0.62                            | 0.0030                         | 0.78                               | 0.63                              | $1.01 \times 10^{-20}$                           |
| NFSe-20           | 0.51                            | 0.0046                         | 0.73                               | 0.51                              | $1.19 \times 10^{-20}$                           |
| NFSe-50           | 0.61                            | 0.0030                         | 0.76                               | 0.60                              | $7.08 \times 10^{-17}$                           |

Wherein,  $R_s$  is the bulk resistance of the electrochemical system, which consists of ion resistance of electrolyte, intrinsic resistance of the electrode and contact resistance between the interface of the active material and current collector. CPE is the equivalent resistance. Freq power.  $n$  represents the distribution index due to the roughness of the electrode with values ranging between 0 and 1. When  $n=1$ , it shows the pure capacitive behavior,  $n=0$  for a pure resistance,  $n=0.5$  represents Warburg impedance.  $R_{ct}$  is the interfacial charge transfer resistance.  $Z_w$  represents is the Warburg impedance, which is related to the electrolyte ion diffusion in the active materials.

Table S2 Comparison of electrochemical performances of some recently reported transition metal selenides-based ASCs.

| Device                                                             | Electrolyte | Energy density                                        | Reference |
|--------------------------------------------------------------------|-------------|-------------------------------------------------------|-----------|
| NiFe <sub>2</sub> Se <sub>4</sub> //AC                             | 3M KOH      | 45.6 Wh kg <sup>-1</sup> at 800 W kg <sup>-1</sup>    | This work |
| NiSe//AC                                                           | 3M KOH      | 31.6 Wh kg <sup>-1</sup> at 800 W kg <sup>-1</sup>    | This work |
| FeSe//AC                                                           | 3M KOH      | 30.84 Wh kg <sup>-1</sup> at 800 W kg <sup>-1</sup>   | This work |
| (NiCo) <sub>9</sub> Se <sub>8</sub> /(NiCo) <sub>0.85</sub> Se//AC | 6M KOH      | 37.54 Wh kg <sup>-1</sup> at 842.7 W kg <sup>-1</sup> | S1        |
| CoSe <sub>2</sub> @MoSe <sub>2</sub> //AC                          | 3M KOH      | 51.84 Wh kg <sup>-1</sup> at 799.2 W kg <sup>-1</sup> | S2        |
| Ni <sub>0.67</sub> Co <sub>0.33</sub> Se//RGO                      | 6M KOH      | 36.7 Wh kg <sup>-1</sup> at 750 W kg <sup>-1</sup>    | S3        |
| Ni <sub>0.67</sub> Co <sub>0.33</sub> Se <sub>2</sub> //RGO        | 3M KOH      | 38.1 Wh kg <sup>-1</sup> at 840 W kg <sup>-1</sup>    | S4        |
| Ni <sub>0.6</sub> Co <sub>0.4</sub> Se <sub>2</sub> //BNPC         | KOH/PVA gel | 42.1 Wh kg <sup>-1</sup>                              | S5        |
| Ni@Ni <sub>0.8</sub> Co <sub>0.2</sub> Se//AC                      | 3M KOH      | 17 Wh kg <sup>-1</sup> at 1526.8 W kg <sup>-1</sup>   | S6        |
| Co <sub>0.85</sub> Se//AC                                          | 3M KOH      | 39.7 Wh kg <sup>-1</sup> at 789.6 W kg <sup>-1</sup>  | S7        |
| KCo <sub>x</sub> Mn <sub>1-x</sub> F <sub>3</sub> //AC             | 3M KOH      | 8 W hkg <sup>-1</sup> at 140 W kg <sup>-1</sup>       | S8        |
| Fe-Ni-Co oxide//RGO                                                | 1M KOH      | 40 Wh kg <sup>-1</sup> at 750 W kg <sup>-1</sup>      | S9        |
| NiCo <sub>2</sub> O <sub>4</sub> /NiFe <sub>2</sub> O <sub>4</sub> | 6M KOH      | 32.4 Wh kg <sup>-1</sup> at 1400 W kg <sup>-1</sup>   | S10       |
| CC@CNTs@NiSe <sub>2</sub> //CC@C<br>NTs                            | 1M KOH      | 11.9 Whkg <sup>-1</sup> at 242 W kg <sup>-1</sup>     | S11       |
| CuCo <sub>2</sub> S <sub>4</sub> //NG                              | 3M KOH      | 32.7Wh kg <sup>-1</sup> at 794 W kg <sup>-1</sup>     | S12       |
| Fe-Co-S/NF//rGO                                                    | 1M KOH      | 43.6 Wh kg <sup>-1</sup> at 770 W kg <sup>-1</sup>    | S13       |
| NiCo-MOF/Ti <sub>3</sub> C <sub>2</sub> T <sub>x</sub> //AC        | 2M KOH      | 39.5 Wh kg <sup>-1</sup> at 562.5 W kg <sup>-1</sup>  | S14       |
| NiCo-LDHs/rGO//rGO                                                 | 3M KOH      | 34.5 Wh kg <sup>-1</sup> at 772 W kg <sup>-1</sup>    | S15       |
| NiSe-G//AC                                                         | 6M KOH      | 50.1 Wh kg <sup>-1</sup> at 816 W kg <sup>-1</sup>    | S16       |

Table S3 Fitted impedance parameters of NiFe<sub>2</sub>Se<sub>4</sub> electrode before and after 10000 cycles.

| Sample       | $R_s$ ( $\Omega$ cm <sup>2</sup> ) | CPE, $Y_o$<br>(S s <sup>n</sup> ) | Freq power.<br>n [0<n<1] | $R_{ct}$ ( $\Omega$ cm <sup>2</sup> ) | W, $Y_o$ (S s <sup>1/2</sup> cm <sup>-2</sup> ) |
|--------------|------------------------------------|-----------------------------------|--------------------------|---------------------------------------|-------------------------------------------------|
| Before cycle | 0.51                               | 0.0046                            | 0.73                     | 0.51                                  | $1.19 \times 10^{-20}$                          |
| After cycles | 0.52                               | 0.0027                            | 0.69                     | 0.73                                  | $2.88 \times 10^{-19}$                          |



## References

- [S1] Liu, Y.; Yan, C.; Wang, G. G.; Li, F.; Kang, Q.; Zhang, H.; Han, J. Selenium-Rich Nickel Cobalt Bimetallic Selenide with Core-Shell Architecture Enables Superior Hybrid Energy Storage Device. *Nanoscale* 2020, 12, 4040–4050.
- [S2] Lu, J.; Pu, L.; Wang, W.; Dai, Y. Construction of Hierarchical Cobalt-Molybdenum Selenide Hollow Nanospheres Architectures for High Performance Battery-Supercapacitor Hybrid Devices. *J. Colloid Interface Sci.* 2020, 563, 435–446.
- [S3] Chen, H.; Chen, S.; Fan, M.; Li, C.; Chen, D.; Tian, G.; Shu, K. Bimetallic Nickel Cobalt Selenides: A New Kind of Electroactive Material for High-Power Energy Storage. *J. Mater. Chem. A* 2015, 3(47), 23653–23659.
- [S4] Hu, Y.; Huang, C. Jiang, S.; Qin, Y.; Chen, H. C. Hierarchical Nickel-Cobalt Selenide Nanoparticles/Nanosheets as Advanced Electroactive Battery Materials for Hybrid Supercapacitors. *J. Colloid Interface Sci.* 2020, 558, 291–300.
- [S5] Wang, Y.; Liu, R.; Sun, S.; Wu, X. Facile Synthesis of Nickel-Cobalt Selenide Nanoparticles as Battery-type Electrode for All-Solid-State Asymmetric Supercapacitors. *J. Colloid Interface Sci.* 2019, 549, 16–21.
- [S6] Guo, K. L.; Cui, S. Z.; Hou, H. W.; Chen, W. H.; Mi, L. W. Hierarchical Ternary Ni–Co–Se Nanowires for High-Performance Supercapacitor Device Design. *Dalton Trans.* 2016, 45, 19458–19465.
- [S7] Gong, C.; Huang, M.; Zhou, P.; Sun, Z.; Fan, L.; Lin, J.; Wu, J. Mesoporous  $\text{Co}_{0.85}\text{Se}$  Nanosheets Supported on Ni Foam as a Positive Electrode Material for Asymmetric Supercapacitor. *Appl. Surface Sci.* 2016, 362, 469–476.
- [S8] Shi, W.; Ding, R.; Li, X.; Xu, Q.; Ying, D.; Huang, Y.; Liu, E. Bimetallic Co-Mn Perovskite Fluorides as Highly-Stable Electrode Materials for Supercapacitors. *Chem. - Eur. J.* 2017, 23(61), 15305–15311.
- [S9] Sahoo, S.; Nguyen, T. T.; Shim, J. Mesoporous Fe-Ni-Co Ternary Oxide Nanoflake Arrays on Ni Foam for High-Performance Supercapacitor Application. *J. Ind. Eng. Chem.* 2018, 53, 181–190.

- [S10] Duan, Y., Huo, Y., Qi, Y., Li, L., Wu, Q., Wang, C., Su, Z. Uniform  $\text{NiCo}_2\text{O}_4/\text{NiFe}_2\text{O}_4$  Hollow Nanospheres with Excellent Properties for Li-ion Batteries and Supercapacitors. *J. Alloys Compd.*, 2018, 767, 223–231.
- [S11] Nie, R., Wang, Q., Sun, P., Wang, R., Yuan, Q., Wang, X. Pulsed Laser Deposition of  $\text{NiSe}_2$  Film on Carbon Nanotubes for High-Performance Supercapacitor. *Eng. Sci.*, 2019, 6, 22–29.
- [S12] Dong, H., Li, Y., Chai, H., Cao, Y., Chen, X. Hydrothermal Synthesis of  $\text{CuCo}_2\text{S}_4$  Nano-Structure and N-Doped Graphene for High-Performance Aqueous Asymmetric Supercapacitor. *ES Energy Environ.*, 2019, 4, 19–16.
- [S13] Le, K., Gao, M., Liu, W., Liu, J., Wang, Z., Wang, F., Murugadoss, V., Wu, S., Ding, T., Guo, Z. MOF-derived Hierarchical Core-Shell Hollow Iron-Cobalt Sulfides Nanoarrays on Ni Foam with Enhanced Electrochemical Properties for High Energy Density Asymmetric Supercapacitors. *Electrochim. Acta*, 2019, 323, 134826.
- [S14] Wang, Y., Liu, Y., Wang, C., Liu, H., Zhang, J., Liu, J., Fan, J., Ding, T., Ryu, J. E., Guo, Z. Significantly Enhanced Ultrathin NiCo-based MOF Nanosheet Electrodes Hybridized with  $\text{Ti}_3\text{C}_2\text{T}_x$  Mxene for High Performance Asymmetric Supercapacitor. *Eng. Sci.*, 2020, 9, 50–59.
- [S15] Le, K., Wang, Z., Wang, F., Wang, Q., Shao, Q., Murugadoss, V., Wu, S., Liu, W., Liu, J., Gao, Q., Guo, Z. Sandwich-like NiCo Layered Double Hydroxide/Reduced Graphene Oxide Nanocomposite Cathodes for High Energy Density Asymmetric Supercapacitors. *Dalton Trans.*, 2019, 48, 5193.
- [S16] Kirubasankar, B., Murugadoss, V., Lin, J., Ding, T., Dong, M., Liu, H., Zhang, J., Li, T., Wang, N., Guo, Z., Angaiah, S. In Situ Grown Nickel Selenide on Graphene Nanohybrid Electrodes for High Energy Density Asymmetric Supercapacitors. *Nanoscale*, 2018, 10, 20414.
